# Supplementary material
Source: PubMed Central journal article supplement (PMC9999365)
Supplement: NIHMS1718785-supplement-1.pdf [file NIHMS1718785-supplement-1.pdf]

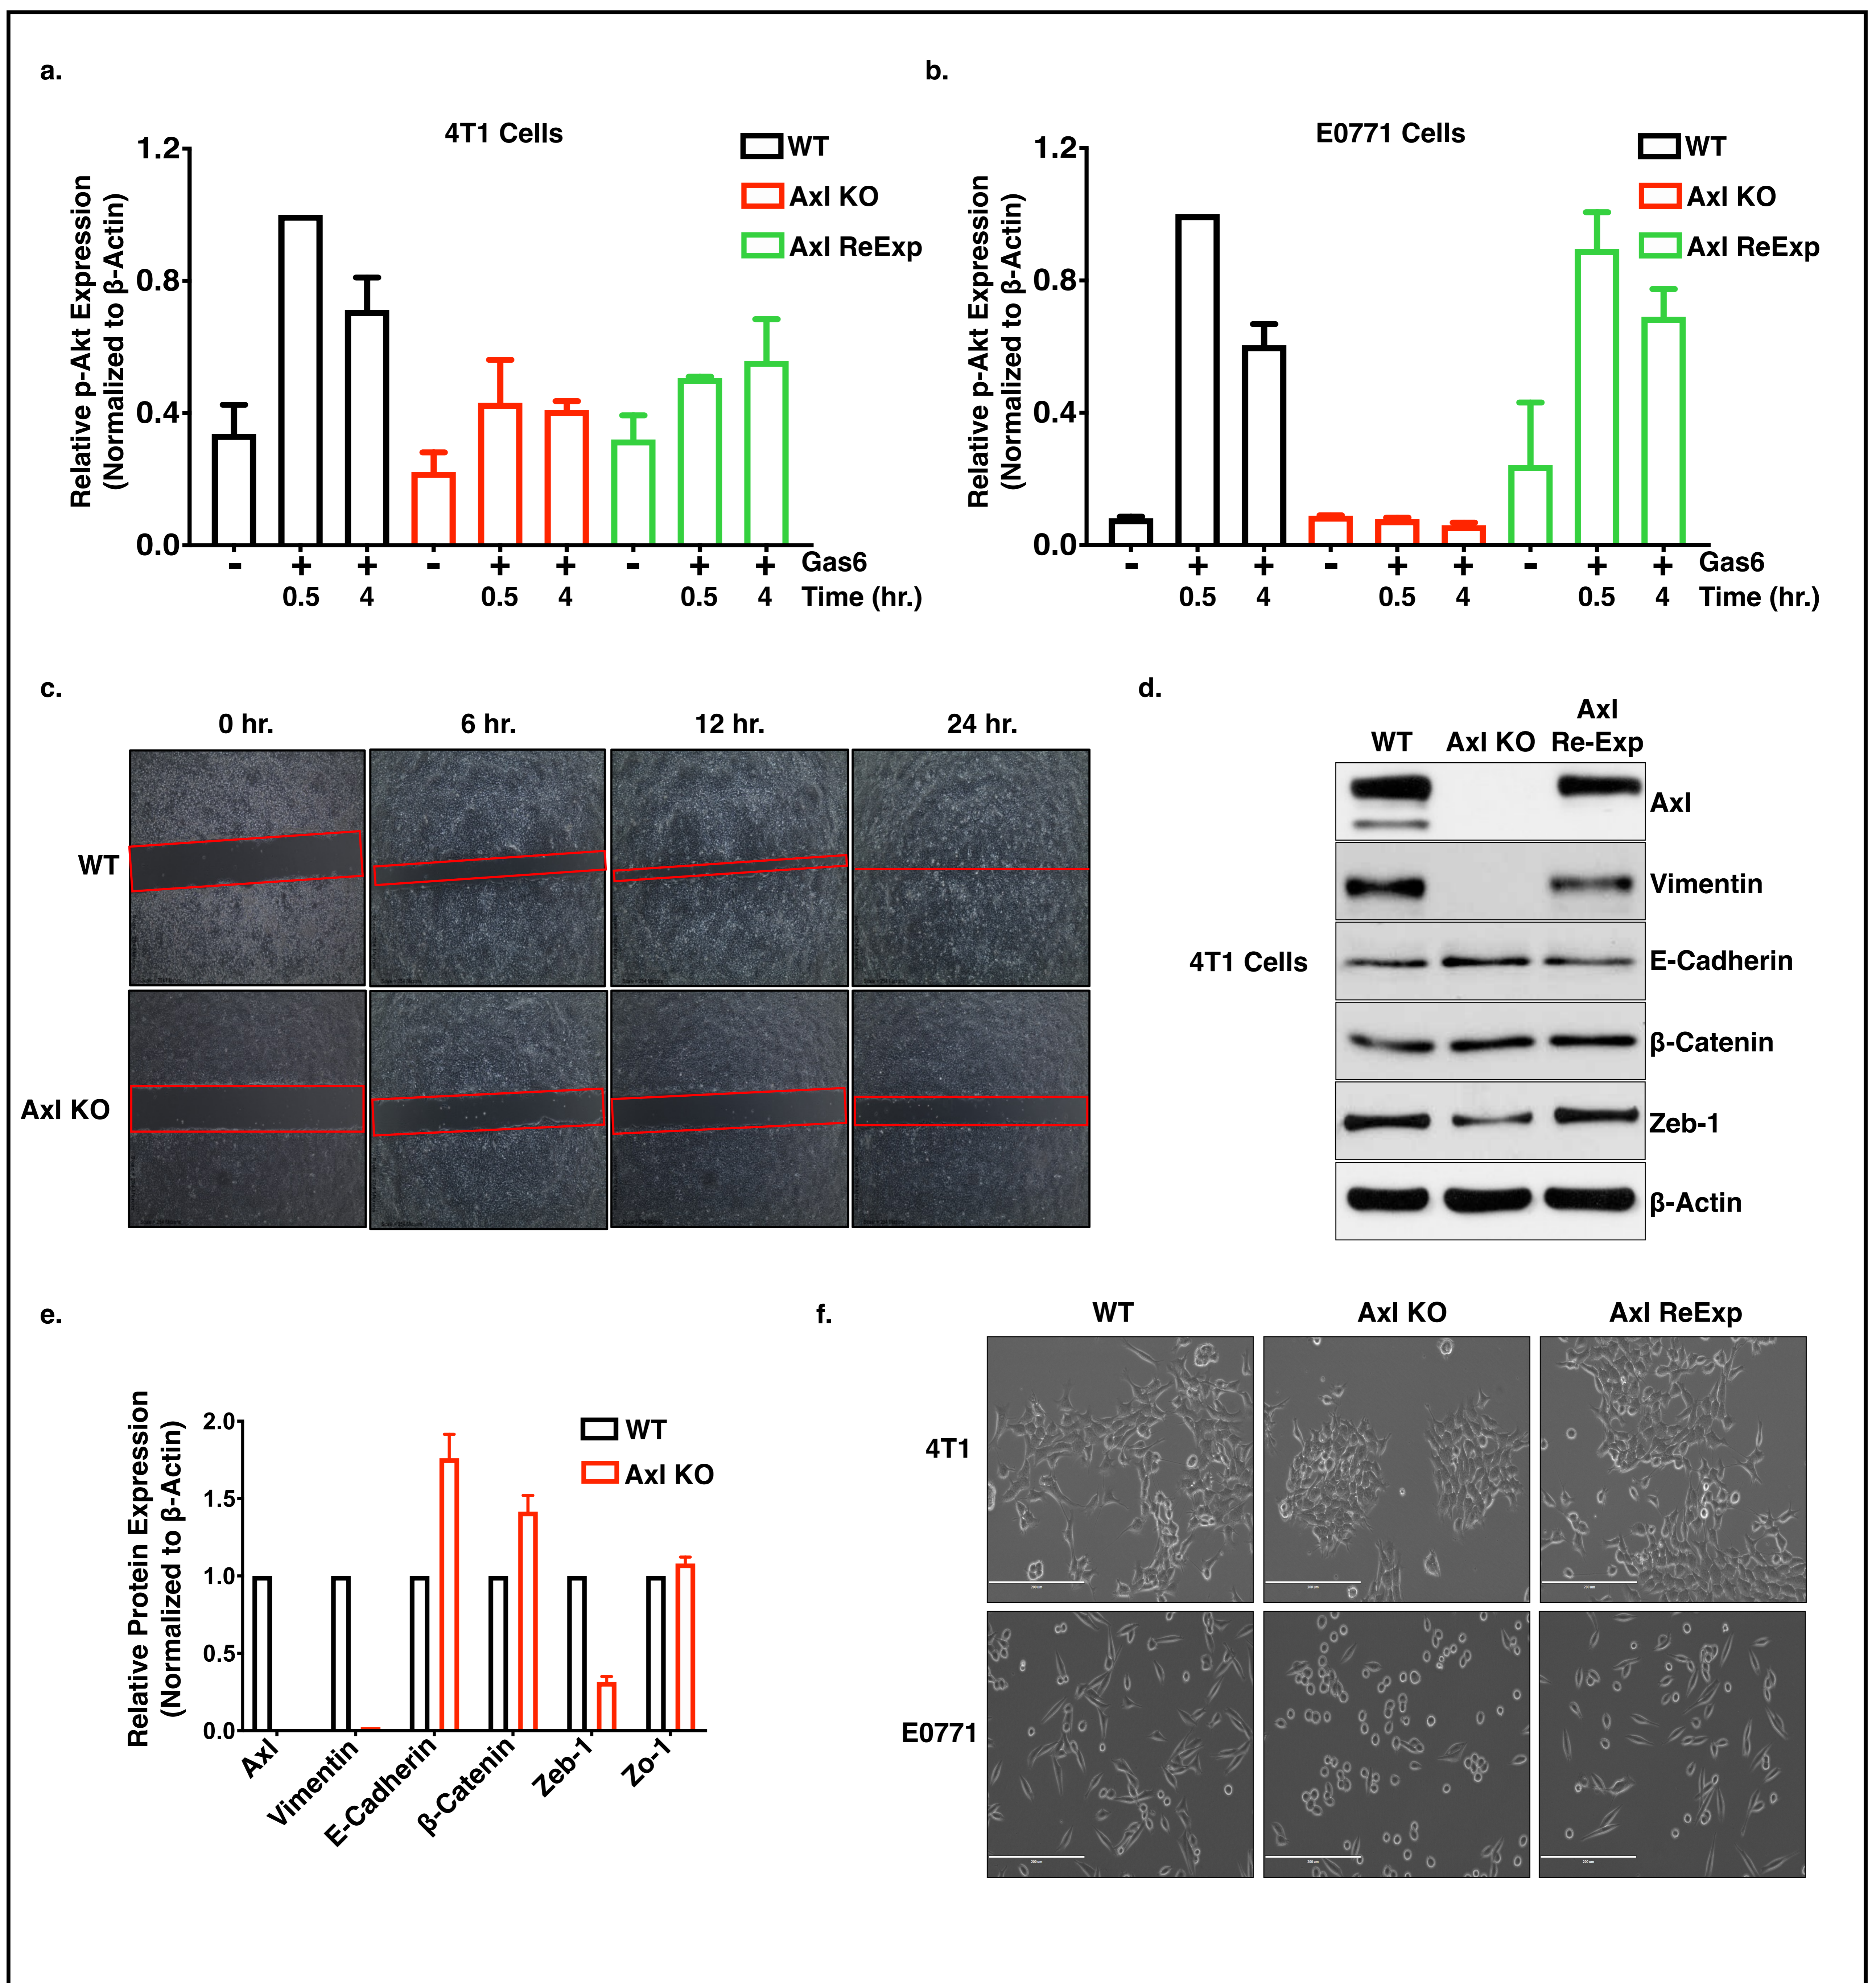

**Fig. S1. Effect of Axl receptor genetic deletion on cell intrinsic tumorigenic properties. a-b.** Bargraph showing normalized expression of phospho Akt immunoblots from 4T1 (a) and E0771 (b)- WT, Axl KO and Axl Re-Exp. cells treated with ligand, Gas6, for 30 mins and 4 hrs., in the 4T1 and E0771- WT, Axl KO and Axl Re-Exp. cells **c.** Cell migration of the 4T1-Wt and Axl receptor KO as determined by wound healing assay. **d.** Immunoblots depicting EMT markers in 4T1- WT, Axl KO and Axl Re-Exp. **e.** cells Bar-graph analysis showing normalized expression of EMT markers immunoblots to  $\beta$ -Actin in from 4T1-Wt and Axl KO cells. **f.** Representative images depicting 4T1 and E0771- WT, Axl KO and Axl Re-Exp. cells morphology.



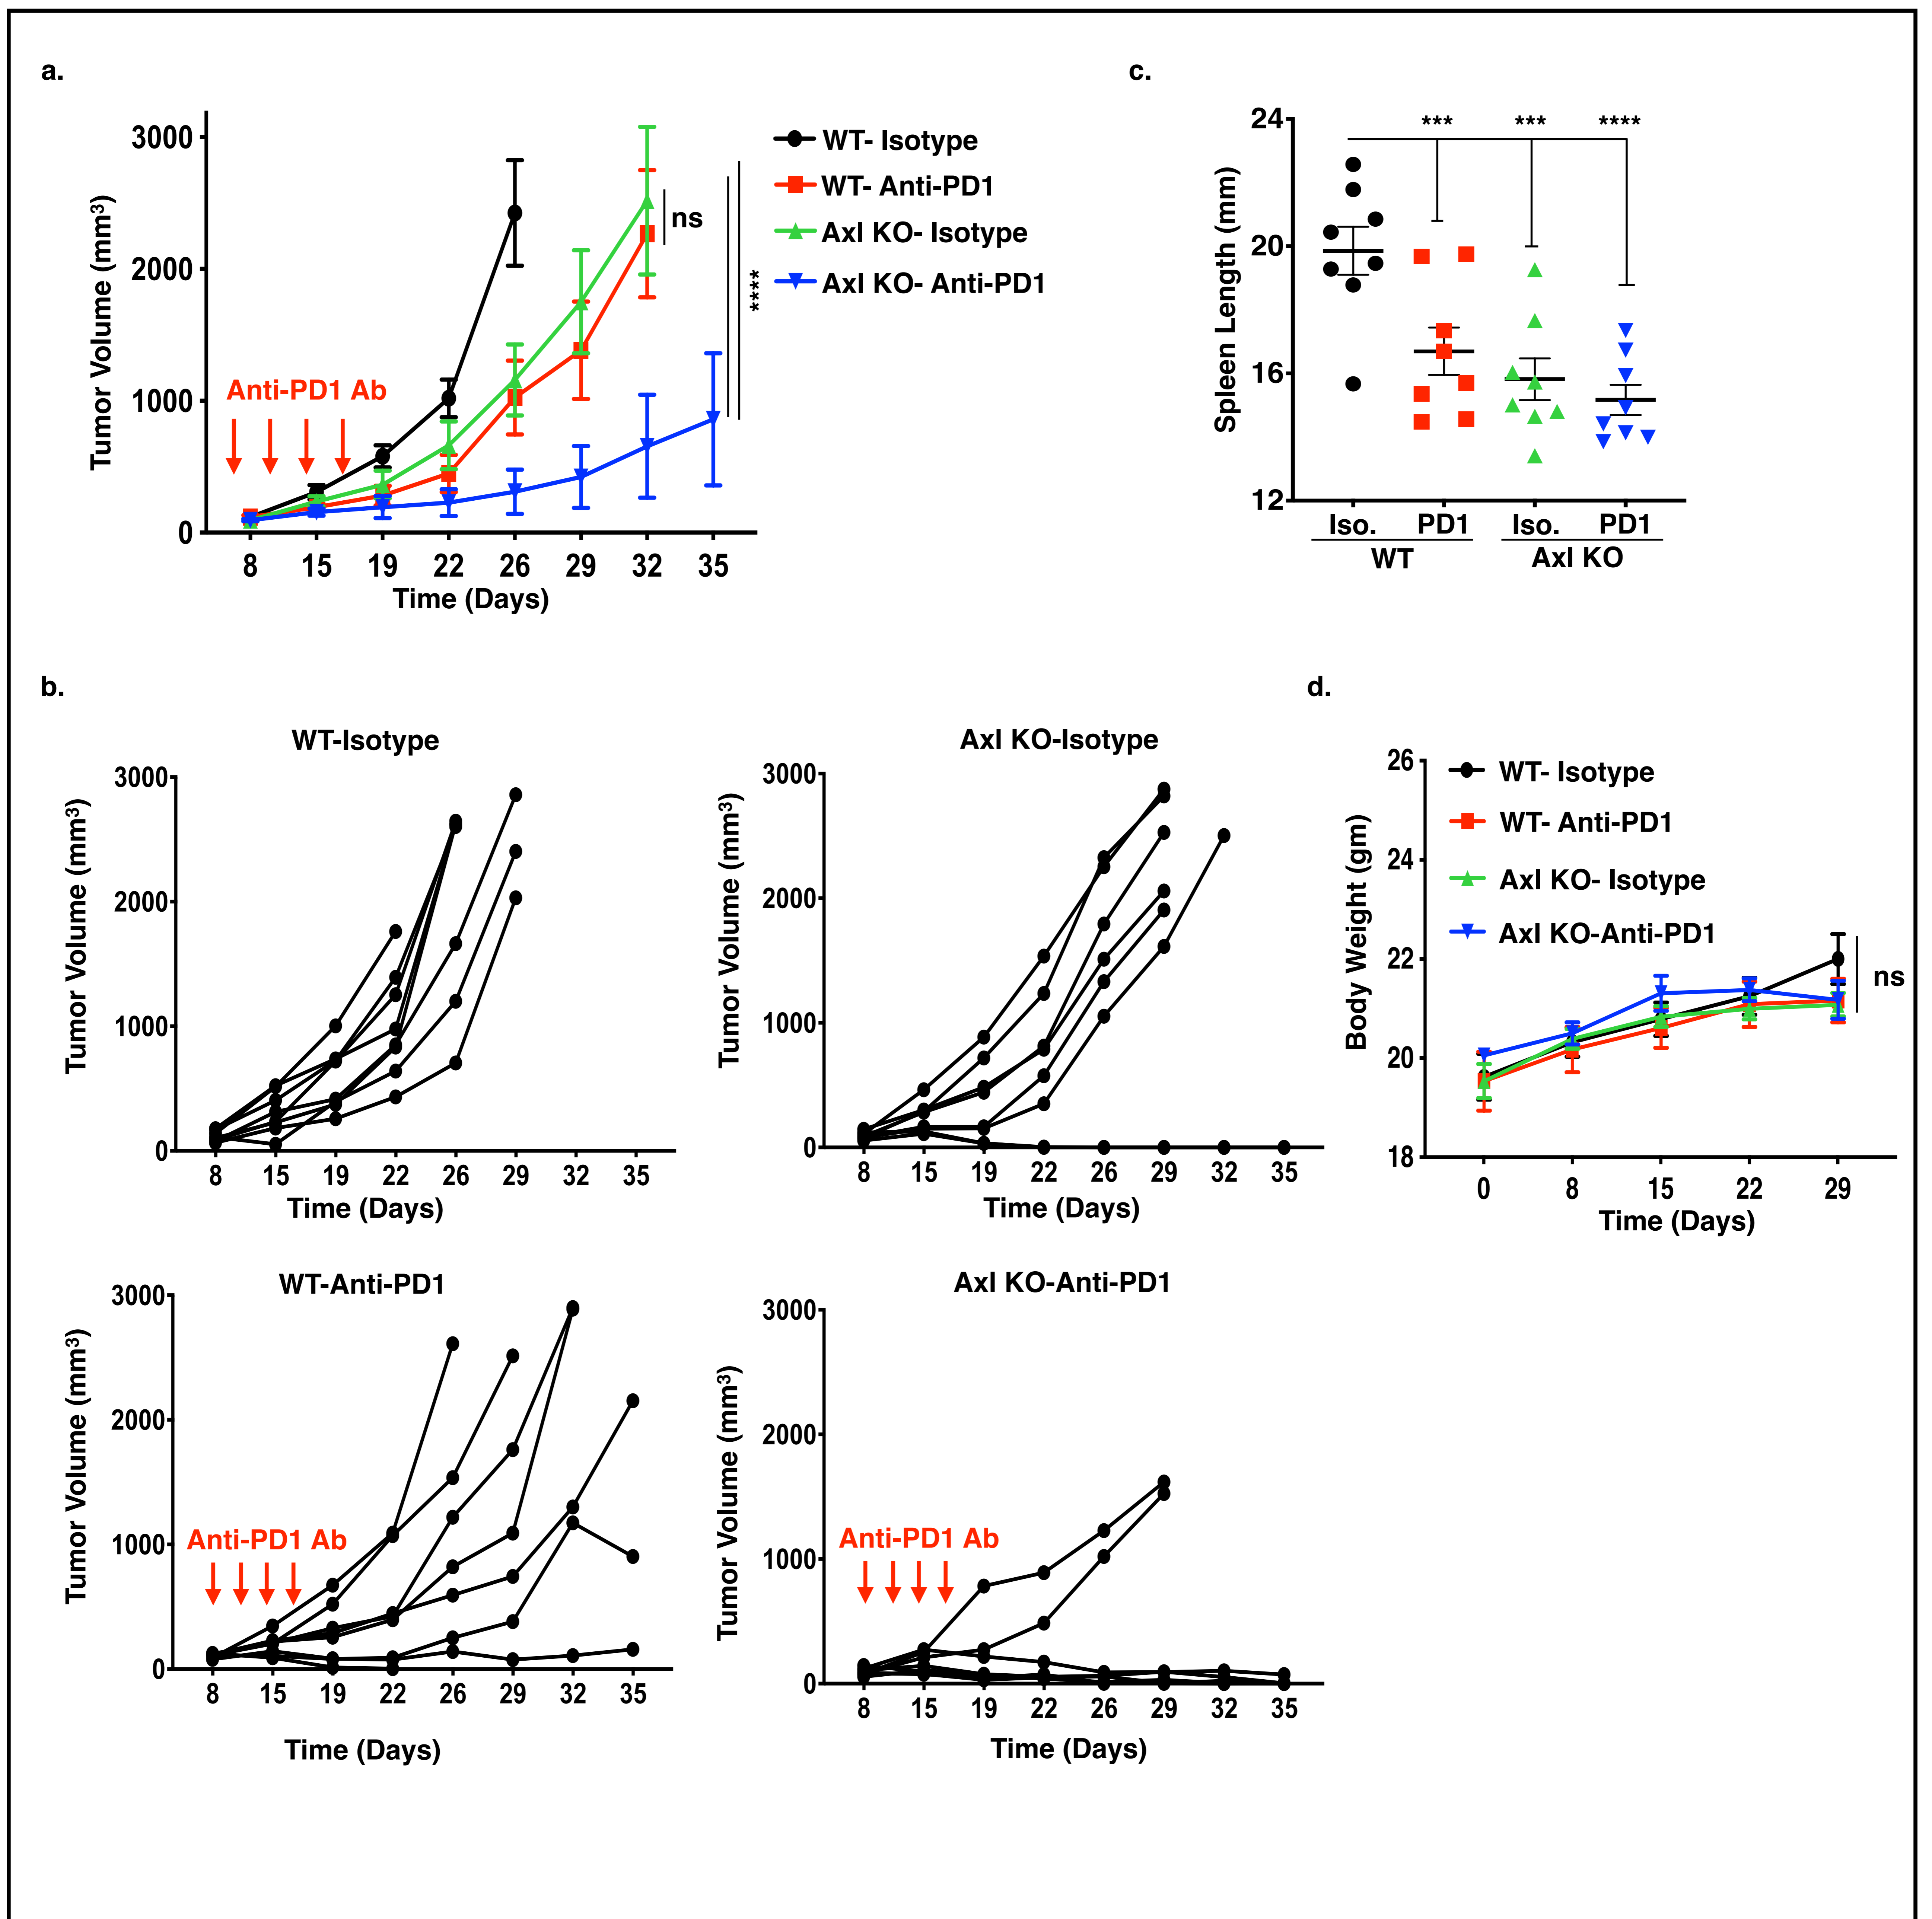

**Fig. S2. Genetic deletion of Axl receptor in murine breast cancer cells inhibit tumor growth and synergies with anti-PD1 immunotherapy in the preclinical murine breast cancer model. a.** Tumor growth analysis of E0771-WT and Axl KO tumor bearing mice (n=8/group) treated with mIgG1 Isotype control Ab or anti-PD1 Ab (5 mg/kg) on day 6, 9, 12, and 15. Arrows indicate antibody injections. **b.** Spider curve showing tumor growth analysis in the E0771-WT and Axl KO tumor bearing mice (n=8/group) treated with mIgG1 Isotype control Ab or anti-PD1 Ab. **c.** Upon sacrifice, spleens were also collected, and their length were quantified. **d.** The whole-body weight of mice was measured once a week over the period of 4 weeks

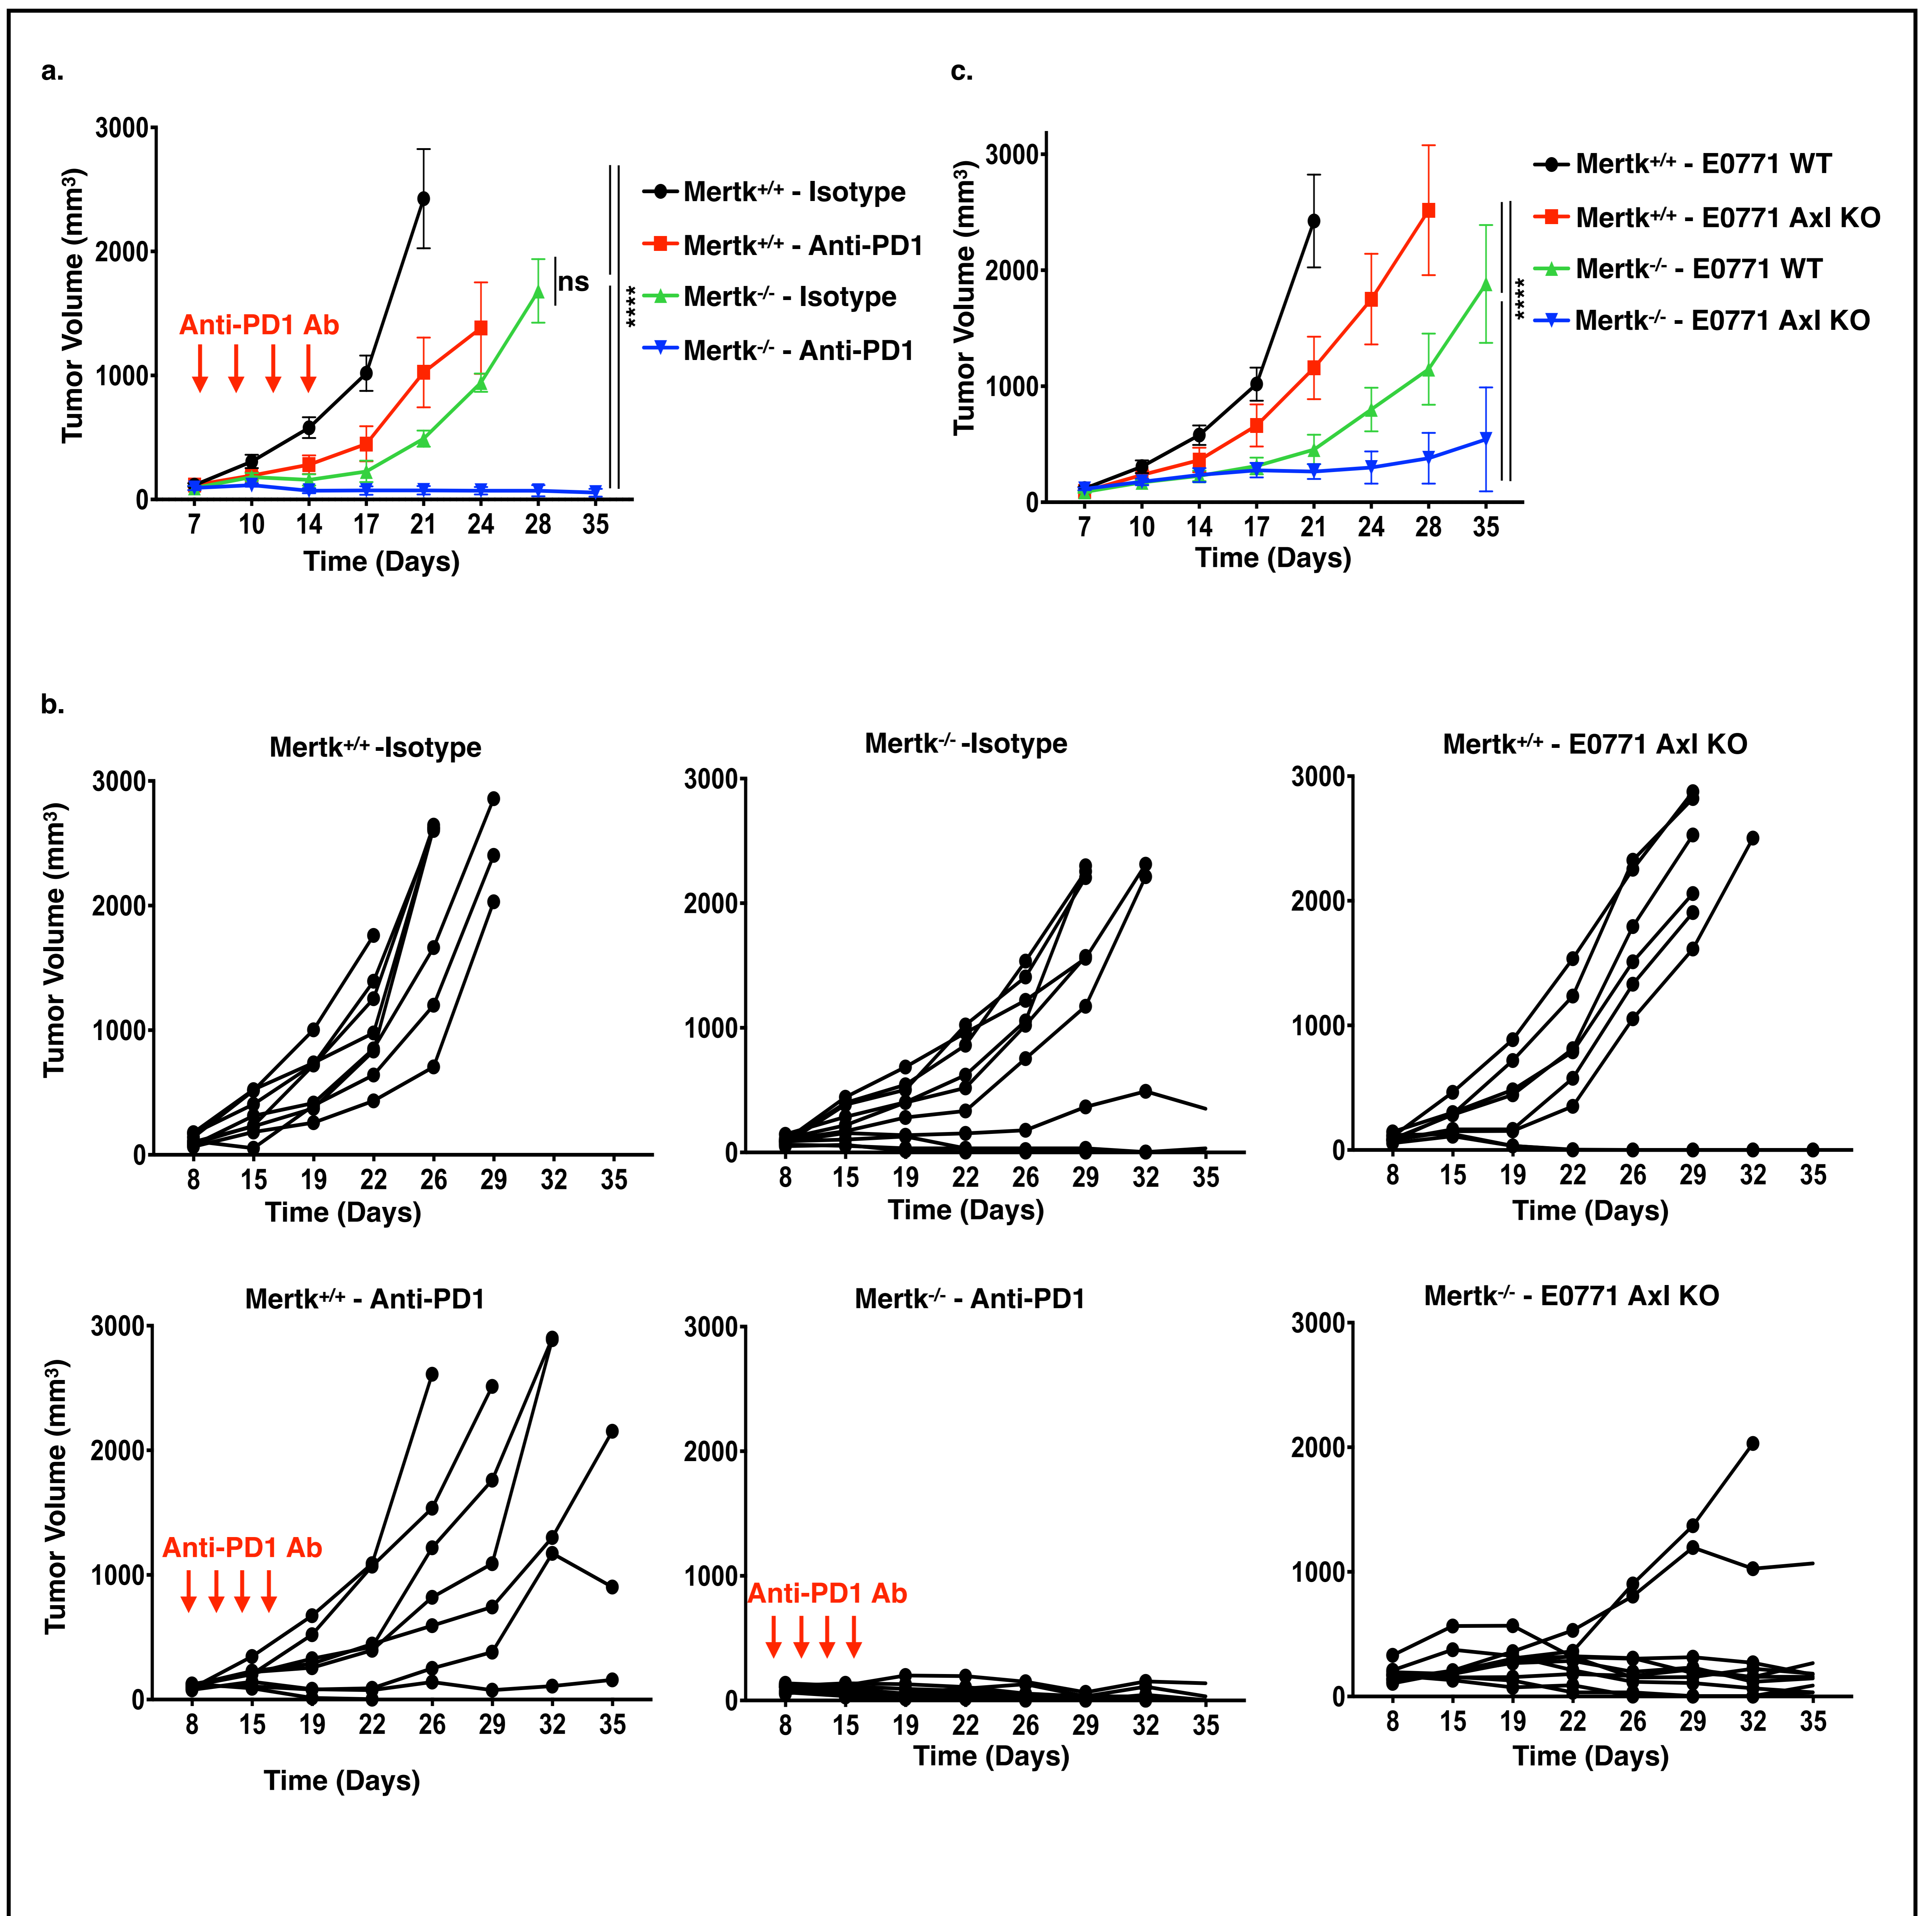

**Figure S3. Mertk deficiency decreases tumor malignancy and synergize with anti-PD1 immunotherapy in the E0771 murine breast cancer model.** **a.** Tumor growth analysis of E0771-WT tumor cells injected orthotopically in to the mammary fat pad of female c57BL/6- Mertk<sup>+/+</sup> (WT) and Mertk<sup>-/-</sup> (Mertk KO) mice, and upon establishment of tumors, mice were treated with mIgG1 Isotype or anti-PD1 antibody (5 mg/kg) on day 6, 9, 12, and 15 and tumor growth determined by means tumor volume measurement every 3 days over the period of 5 weeks. (n=8/per group). **b.** Spider curve showing tumor growth analysis in the different treatment groups in Mertk<sup>+/+</sup> and Mertk<sup>-/-</sup> mice. **c.** Tumor growth analysis of E0771-WT and Axl KO tumor cells injected orthotopically in to the mammary fat pad of female c57BL/6- Mertk<sup>+/+</sup> and Mertk<sup>-/-</sup> mice.



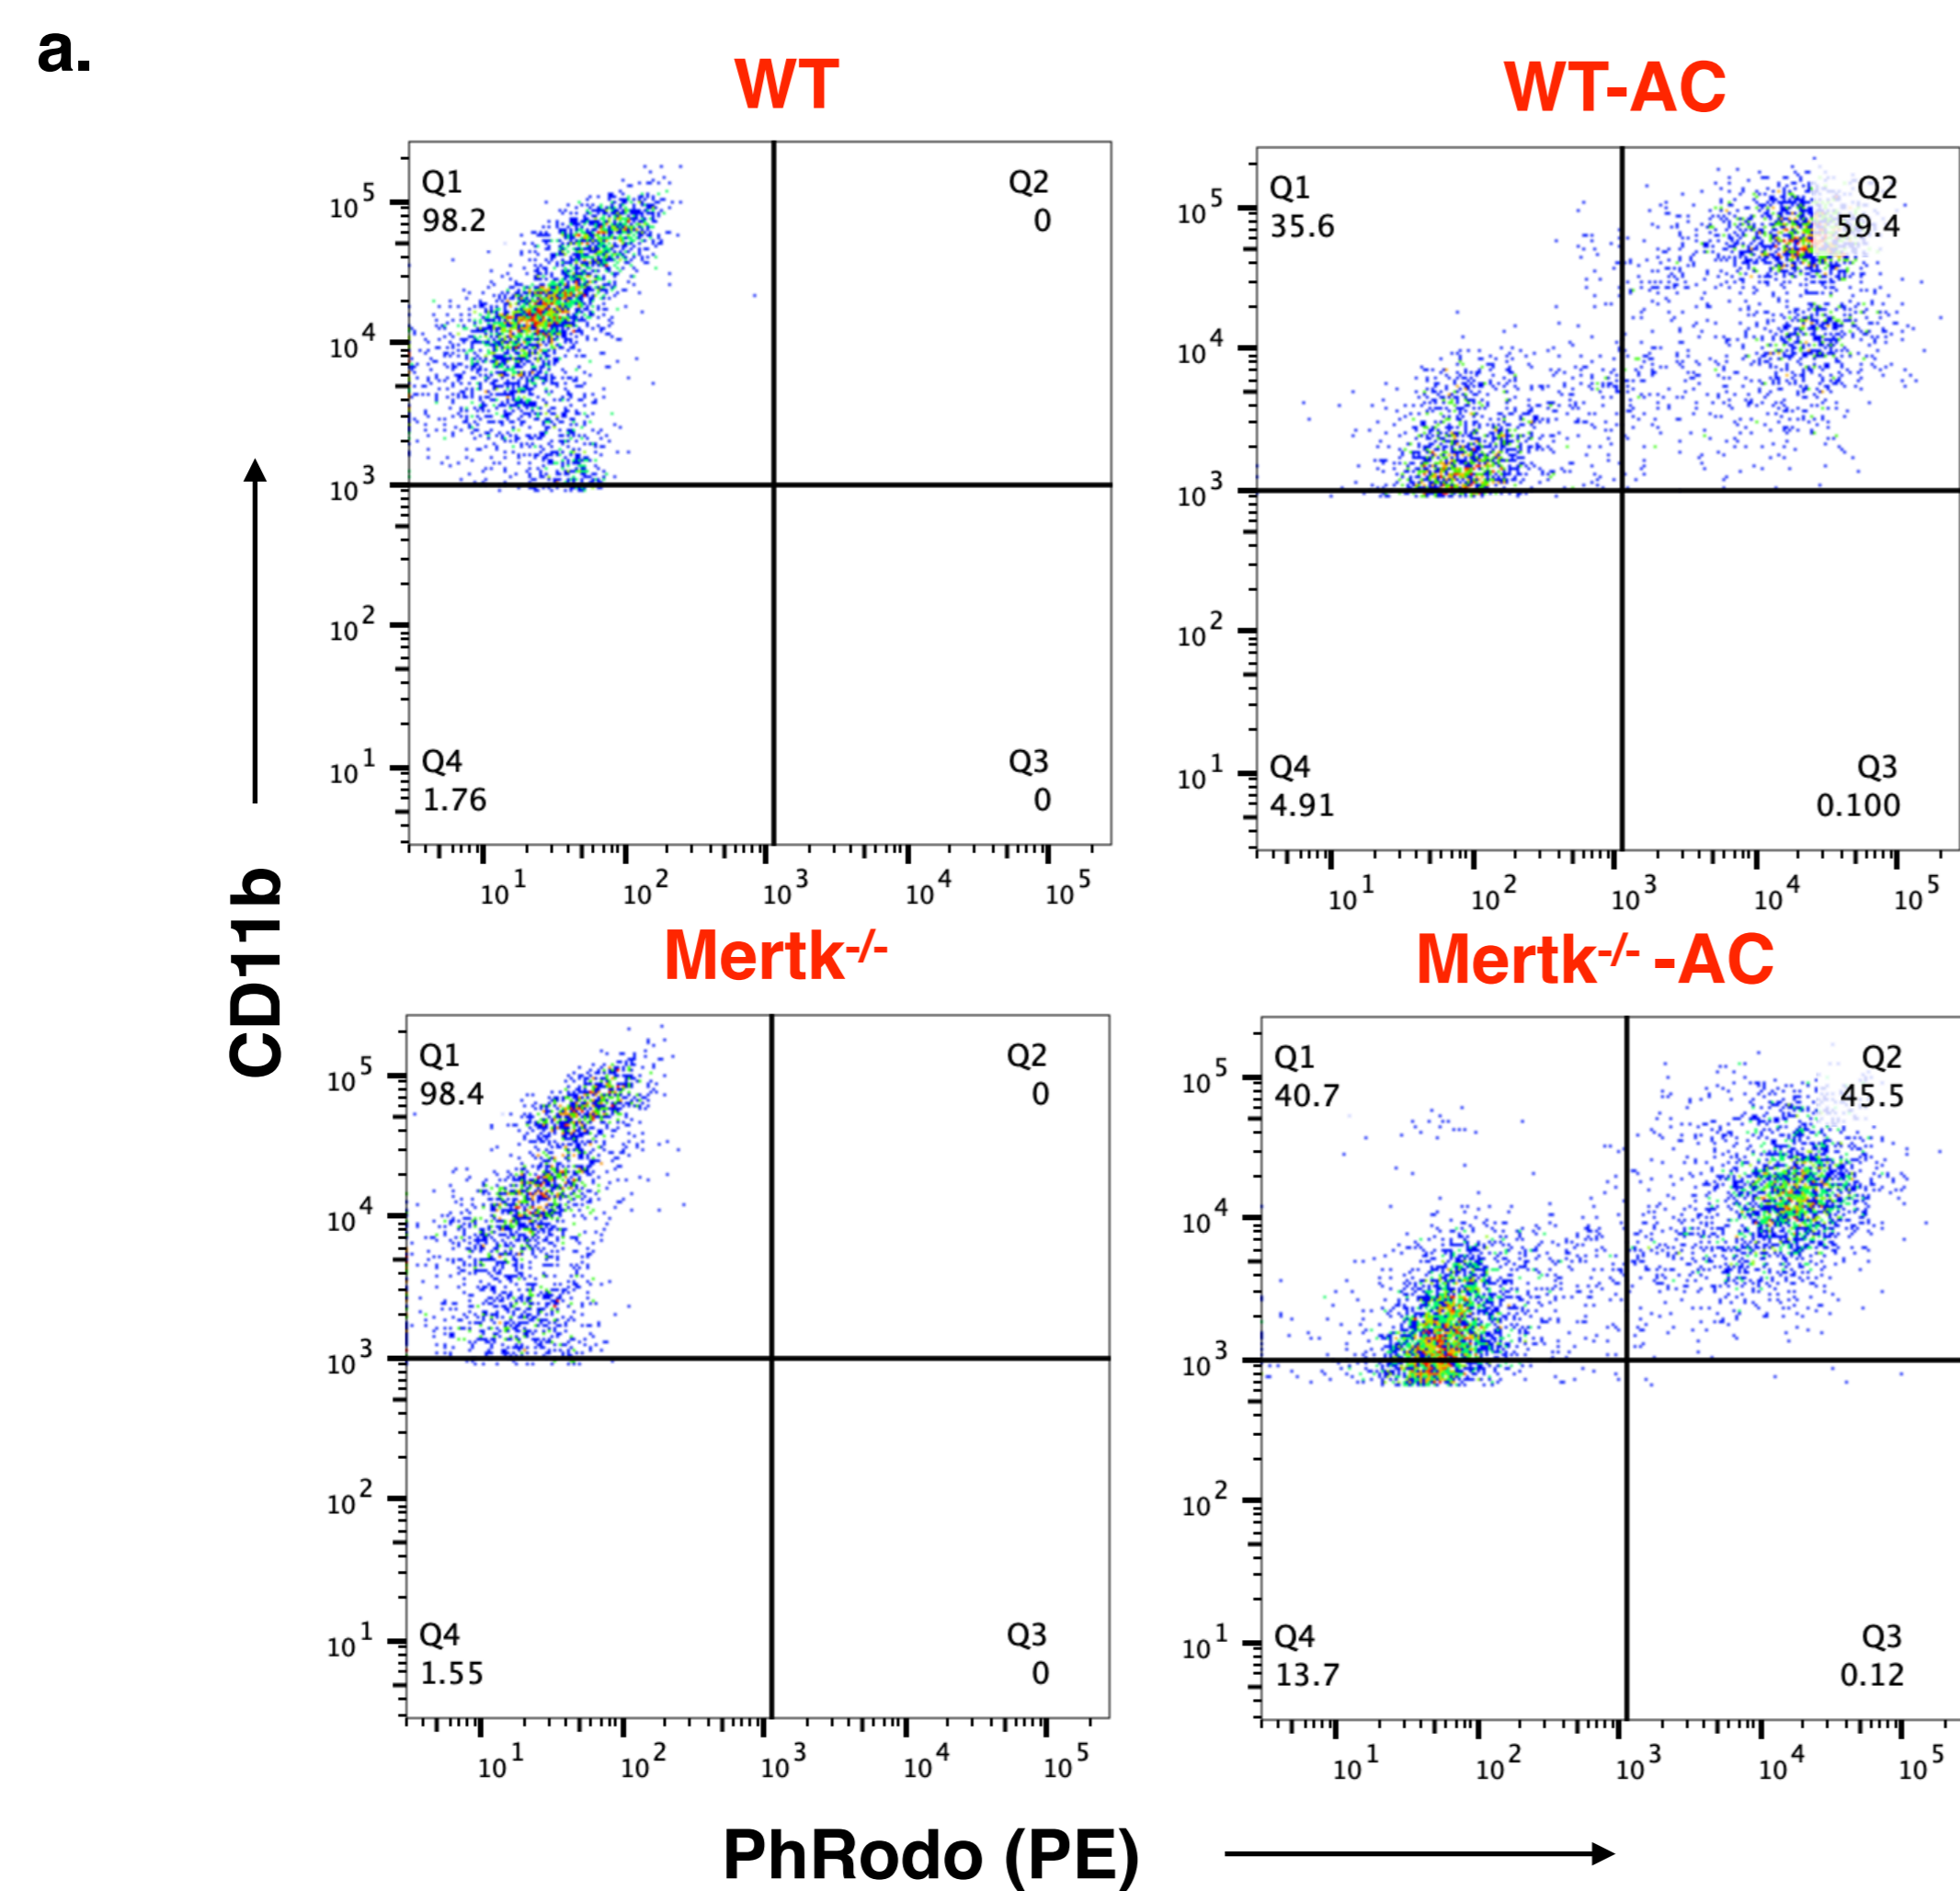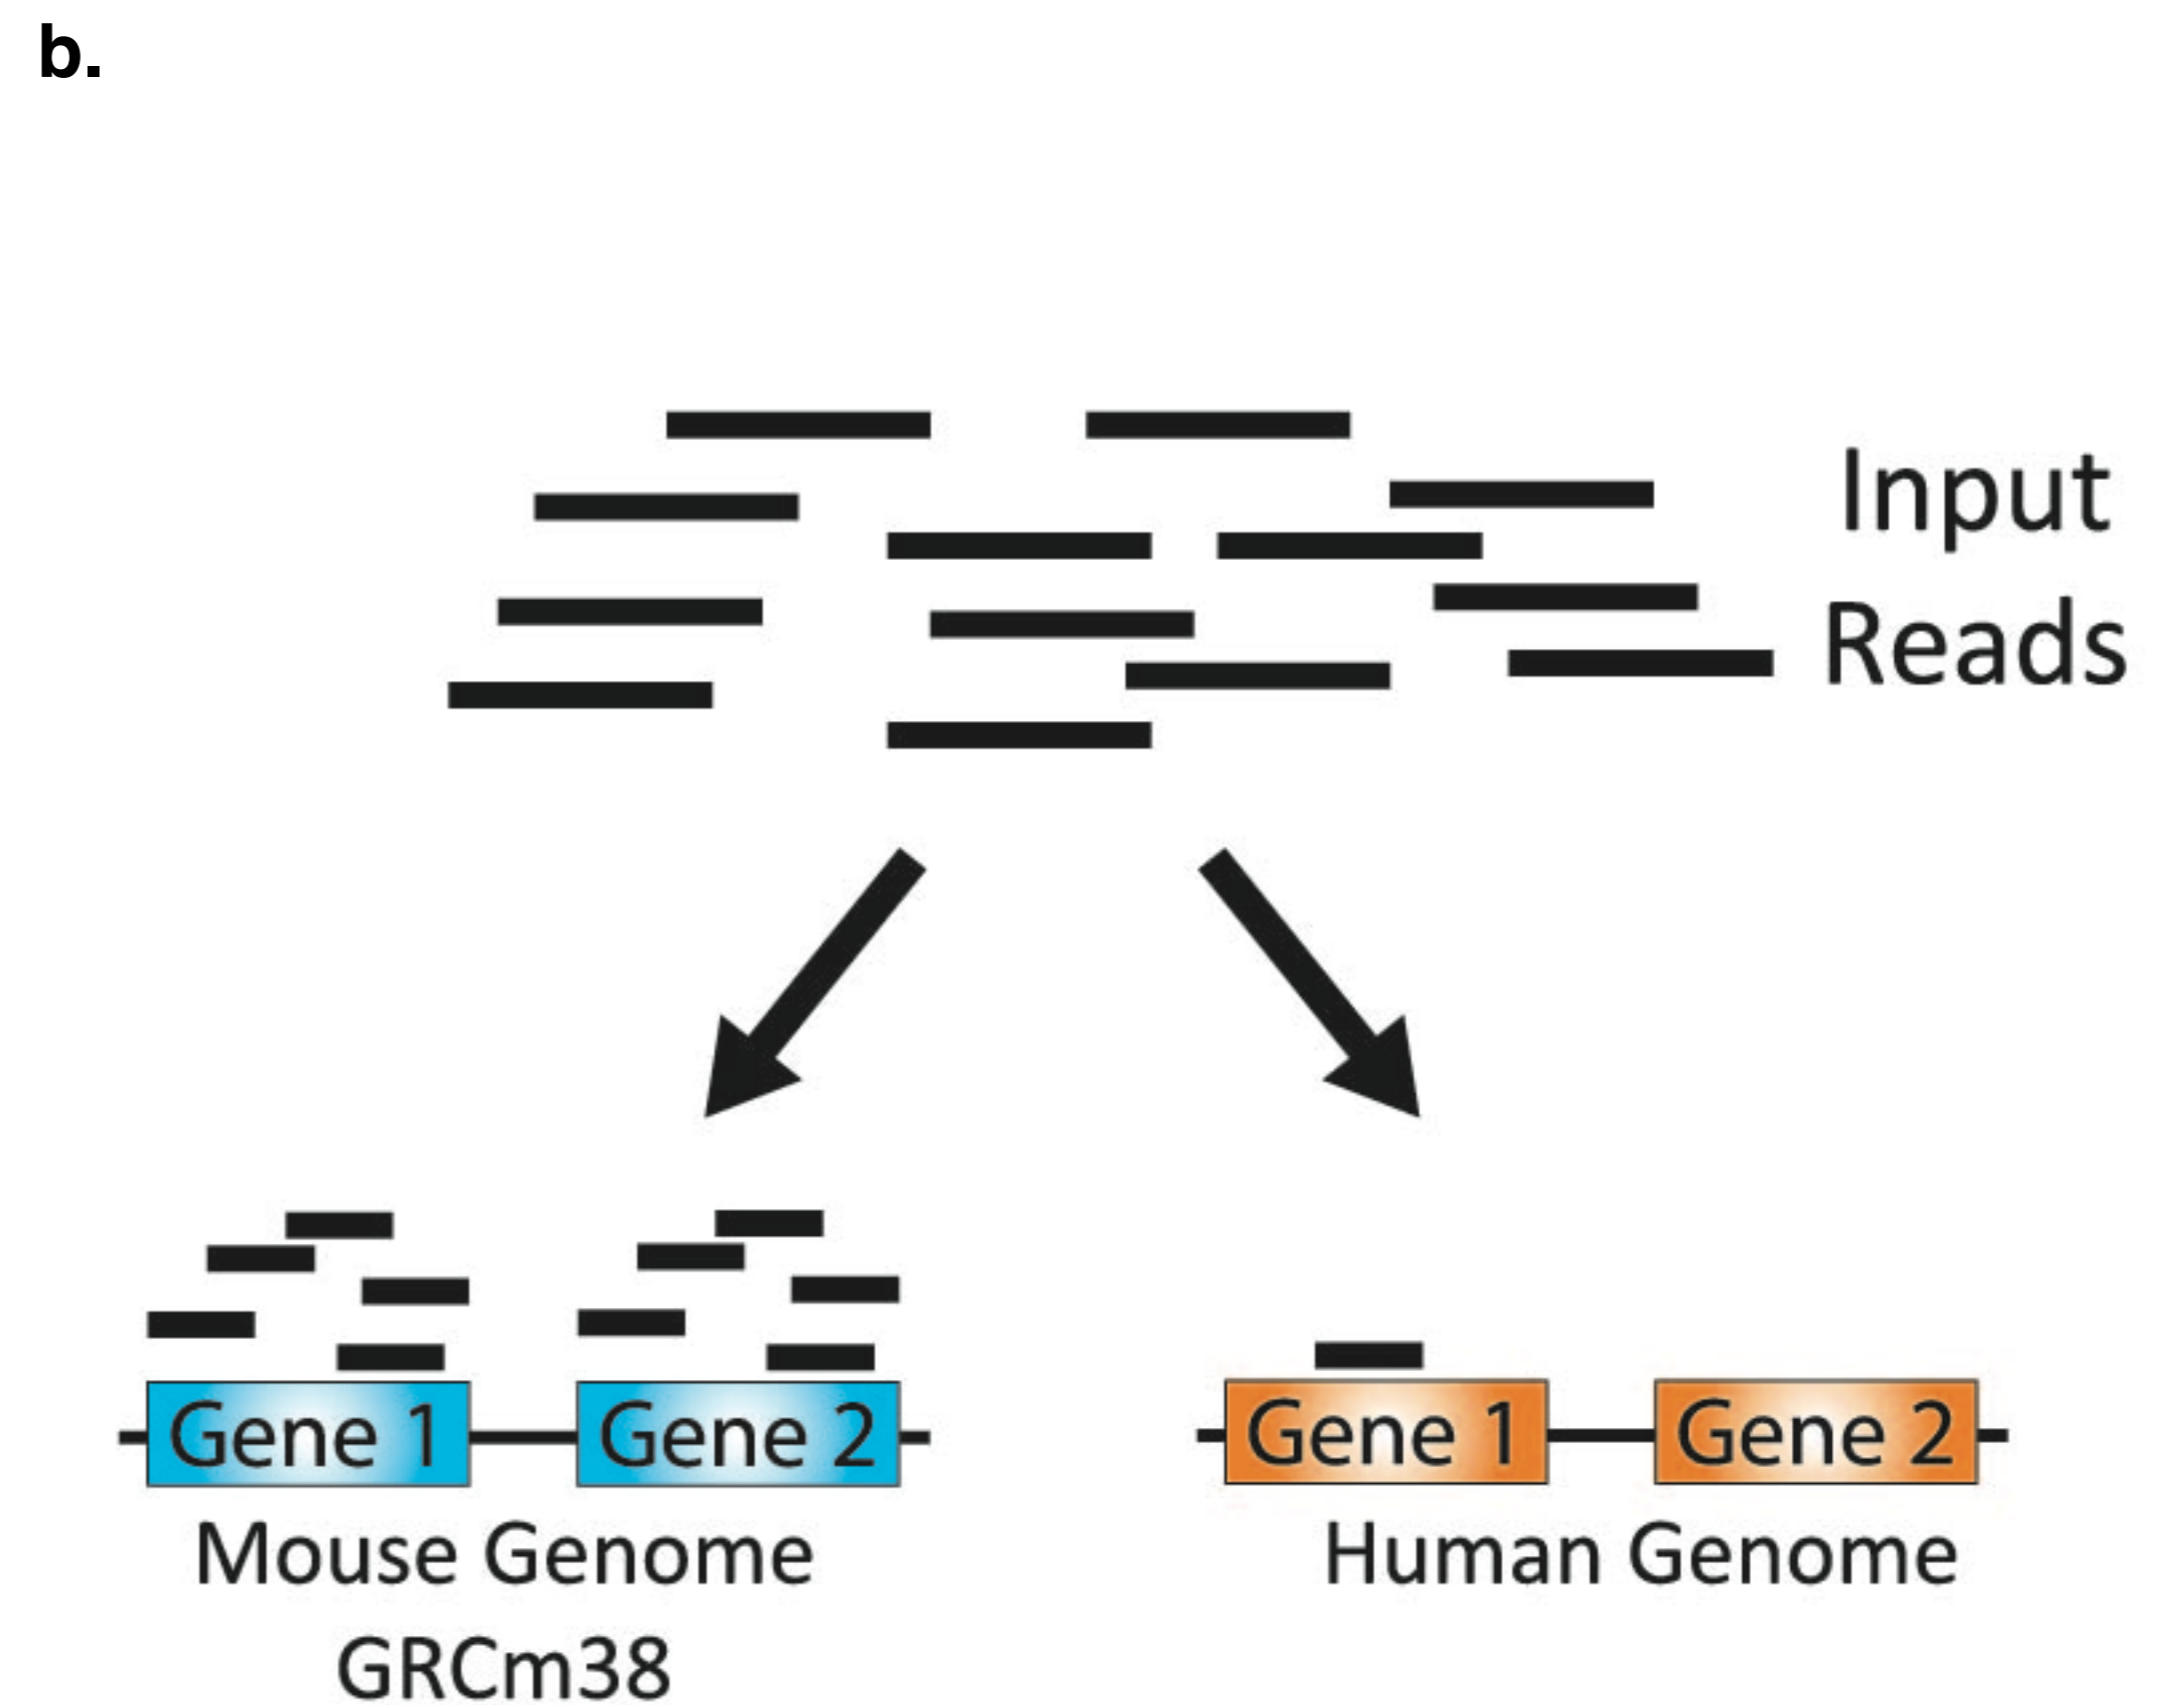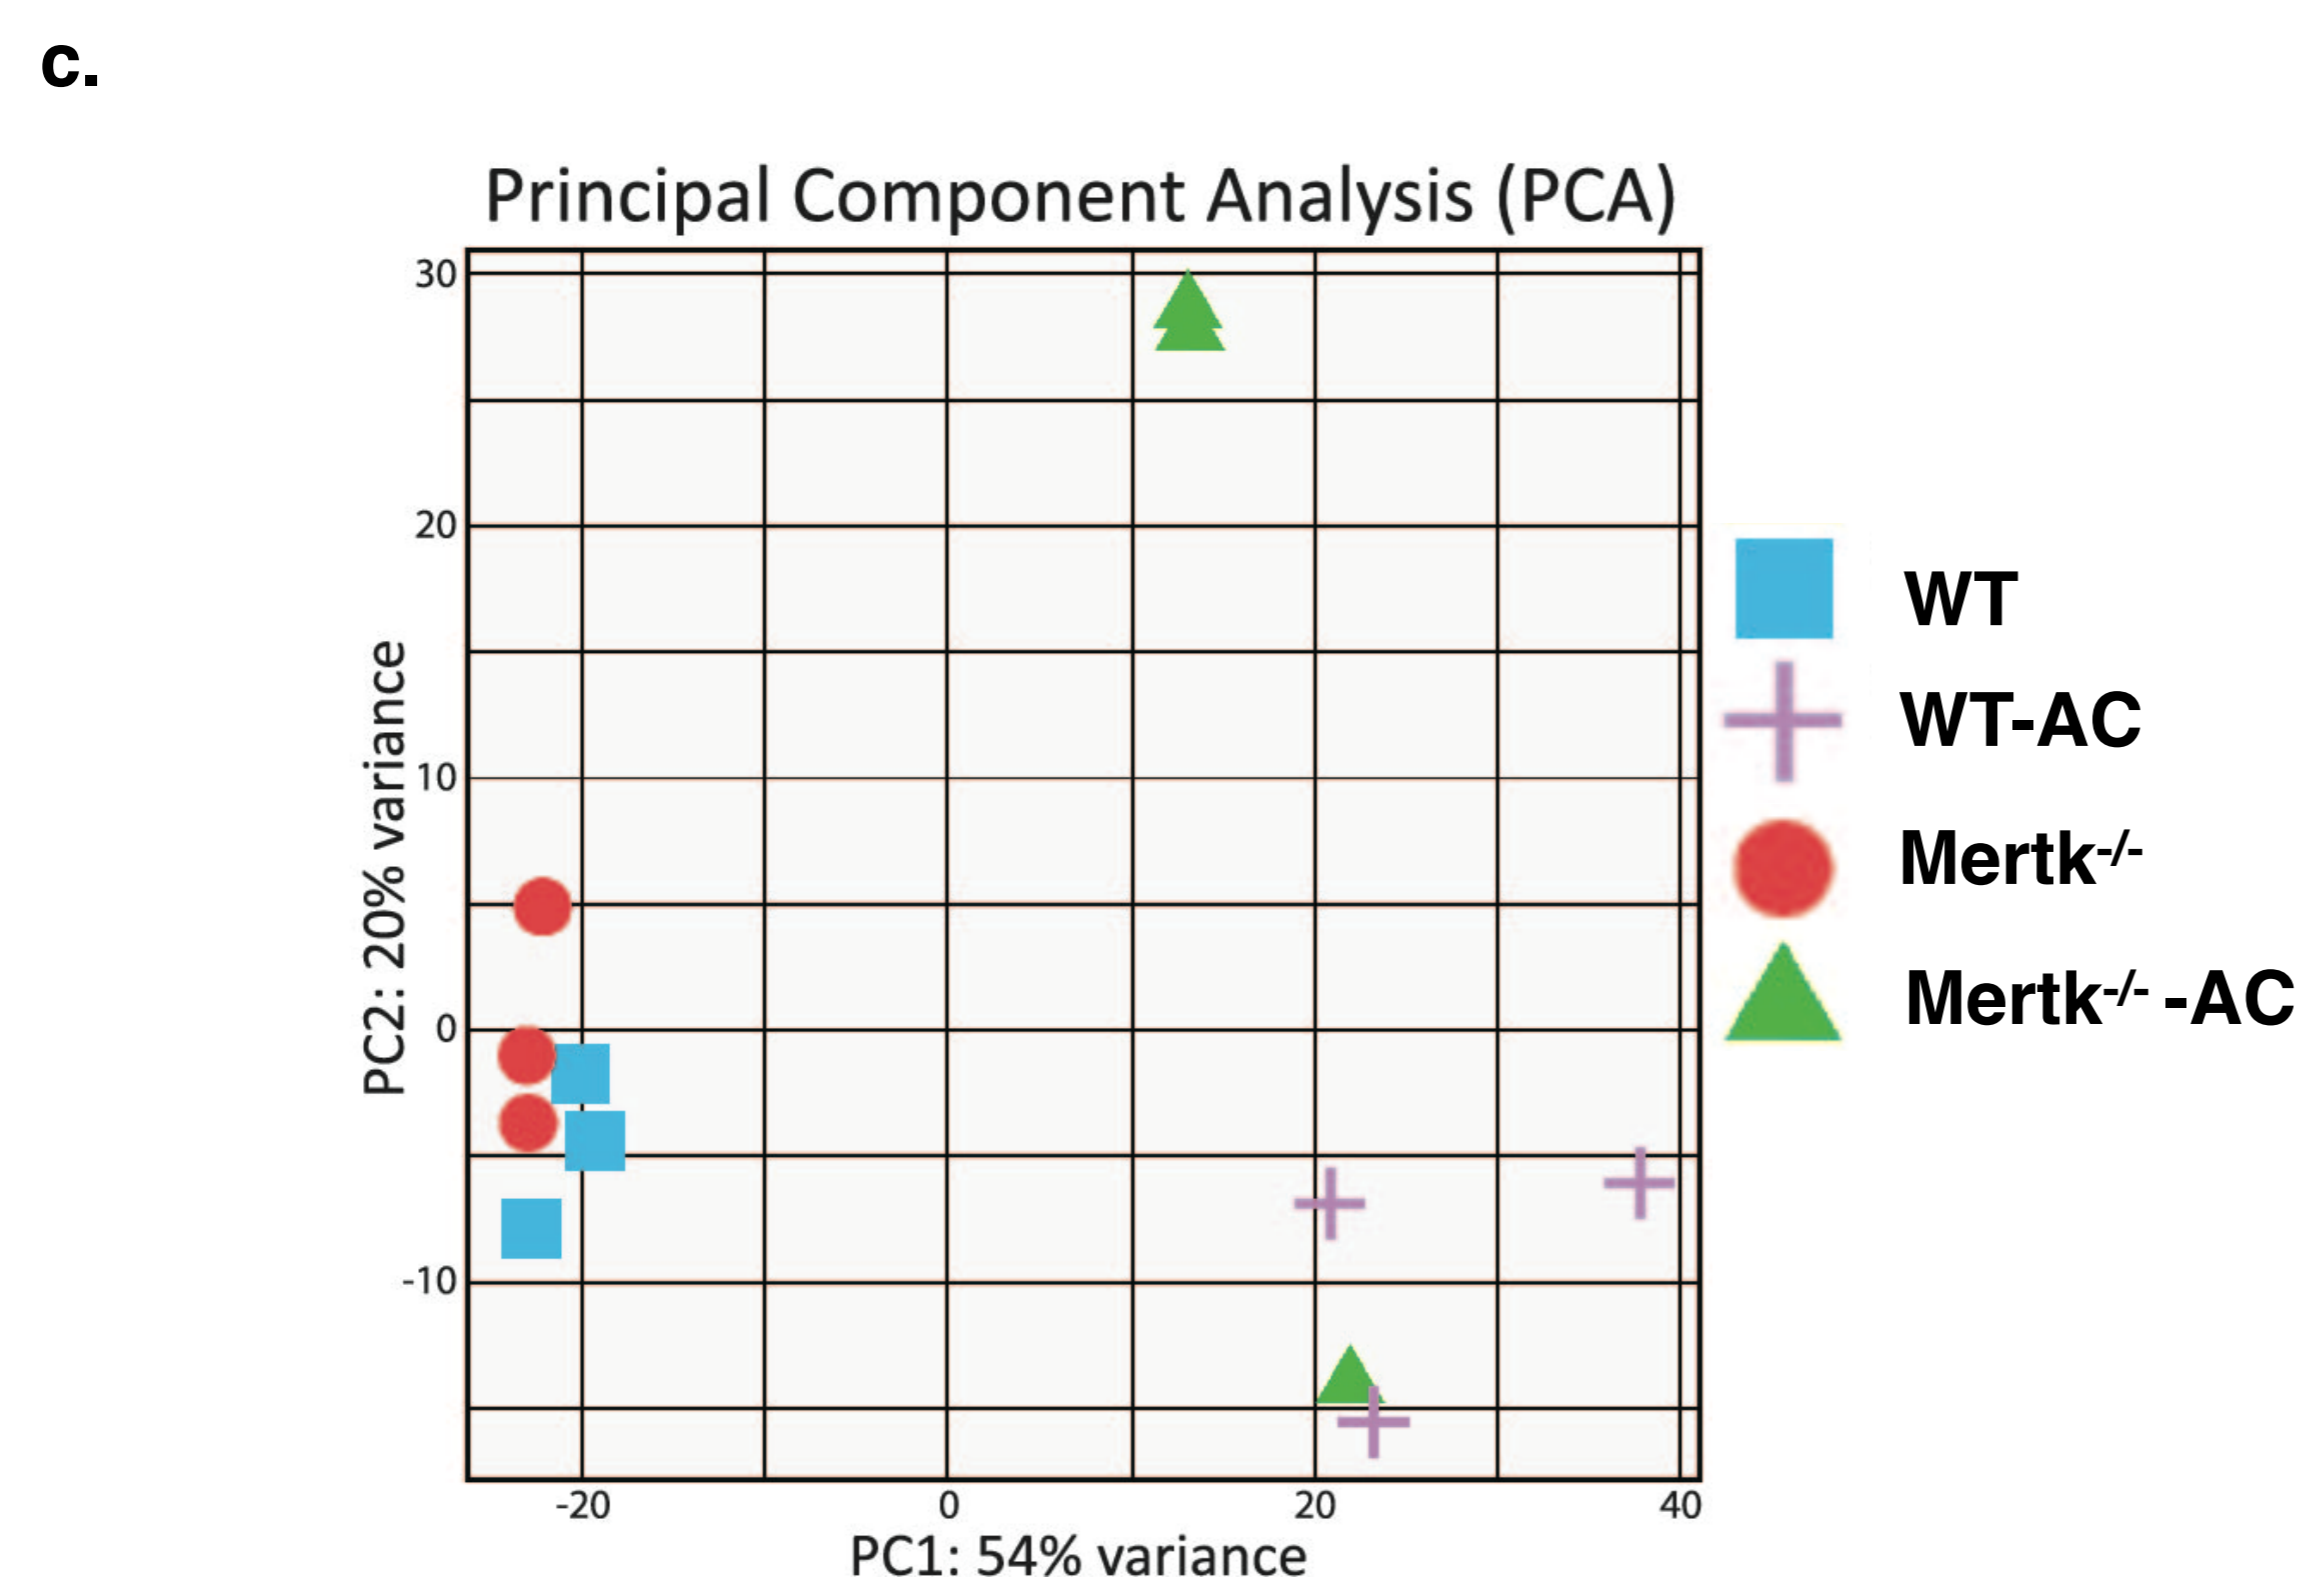

**d.**

| Genes   | WT vs Mertk <sup>-/-</sup> | WT vs WT-AC | Mertk <sup>-/-</sup> vs Mertk <sup>-/-</sup> -AC | WT-AC vs Mertk <sup>-/-</sup> -AC |
|---------|----------------------------|-------------|--------------------------------------------------|-----------------------------------|
| PTGS2   | -6.2549                    | 286.6857    | 116.4315                                         | -15.4013                          |
| CCL4    | -2.0185                    | 45.4427     | 31.7524                                          | -2.8888                           |
| Ccl2    | 1.2189                     | 38.3227     | 16.9757                                          | -1.8520                           |
| CCL3L3  | -2.2493                    | 25.2512     | 21.5348                                          | -2.6374                           |
| CXCL10  | -2.6436                    | 10.3995     | 7.9612                                           | -3.4532                           |
| CSF3    | -4.9760                    | 349.6706    | 93.6750                                          | -18.5743                          |
| IL10    | -2.1048                    | 110.5470    | 41.9003                                          | -5.5532                           |
| TNF     | -1.4015                    | 73.0761     | 23.8129                                          | -4.3009                           |
| CD44    | -1.4898                    | 2.0928      | 1.8510                                           | -1.6845                           |
| ADORA2B | 1.0505                     | 5.4627      | 2.8883                                           | -1.8003                           |
| ITGA5   | 1.1494                     | 4.6671      | 2.2580                                           | -1.7983                           |
| CX3CR1  | -1.1353                    | -1.9949     | -3.5775                                          | -2.0360                           |
| IL1B    | -2.6704                    | 73.9118     | 11.3352                                          | -17.4126                          |
| IL6     | -2.0445                    | 17.8515     | 4.4711                                           | -8.1630                           |
| PLEC    | 1.3709                     | 3.3053      | 1.2790                                           | -1.8852                           |
| C3      | -1.2302                    | 1.4840      | 1.1449                                           | -1.5946                           |
| Retnla  | 1.4747                     | -1.3719     | 3.1318                                           | 6.3363                            |
| LRRK2   | -1.3792                    | 1.6006      | -1.0725                                          | -2.3675                           |
| HCK     | -1.5624                    | 1.1840      | 1.0057                                           | -1.8393                           |

**Fig. S4. Effect of Mertk receptor ablation on the efferocytosis mediated gene expression profile.** **a.** Flowcytometry analysis showing CD11b F4/80 positive macrophages with engulfed apoptotic cells in WT vs Mertk deficient macrophages. **b.** Model depicting approach used for consideration of the homology between human and mouse genome, resulting in a proportion of human reads being segregated from mouse. A thorough investigation on potential cross-mapping was performed. **c.** Principal component analysis showing variance among the experimental samples. **d.** Fold change data demonstrated among the genes selected from inflammatory response and activation of macrophages pathways from ingenuity pathway analysis.



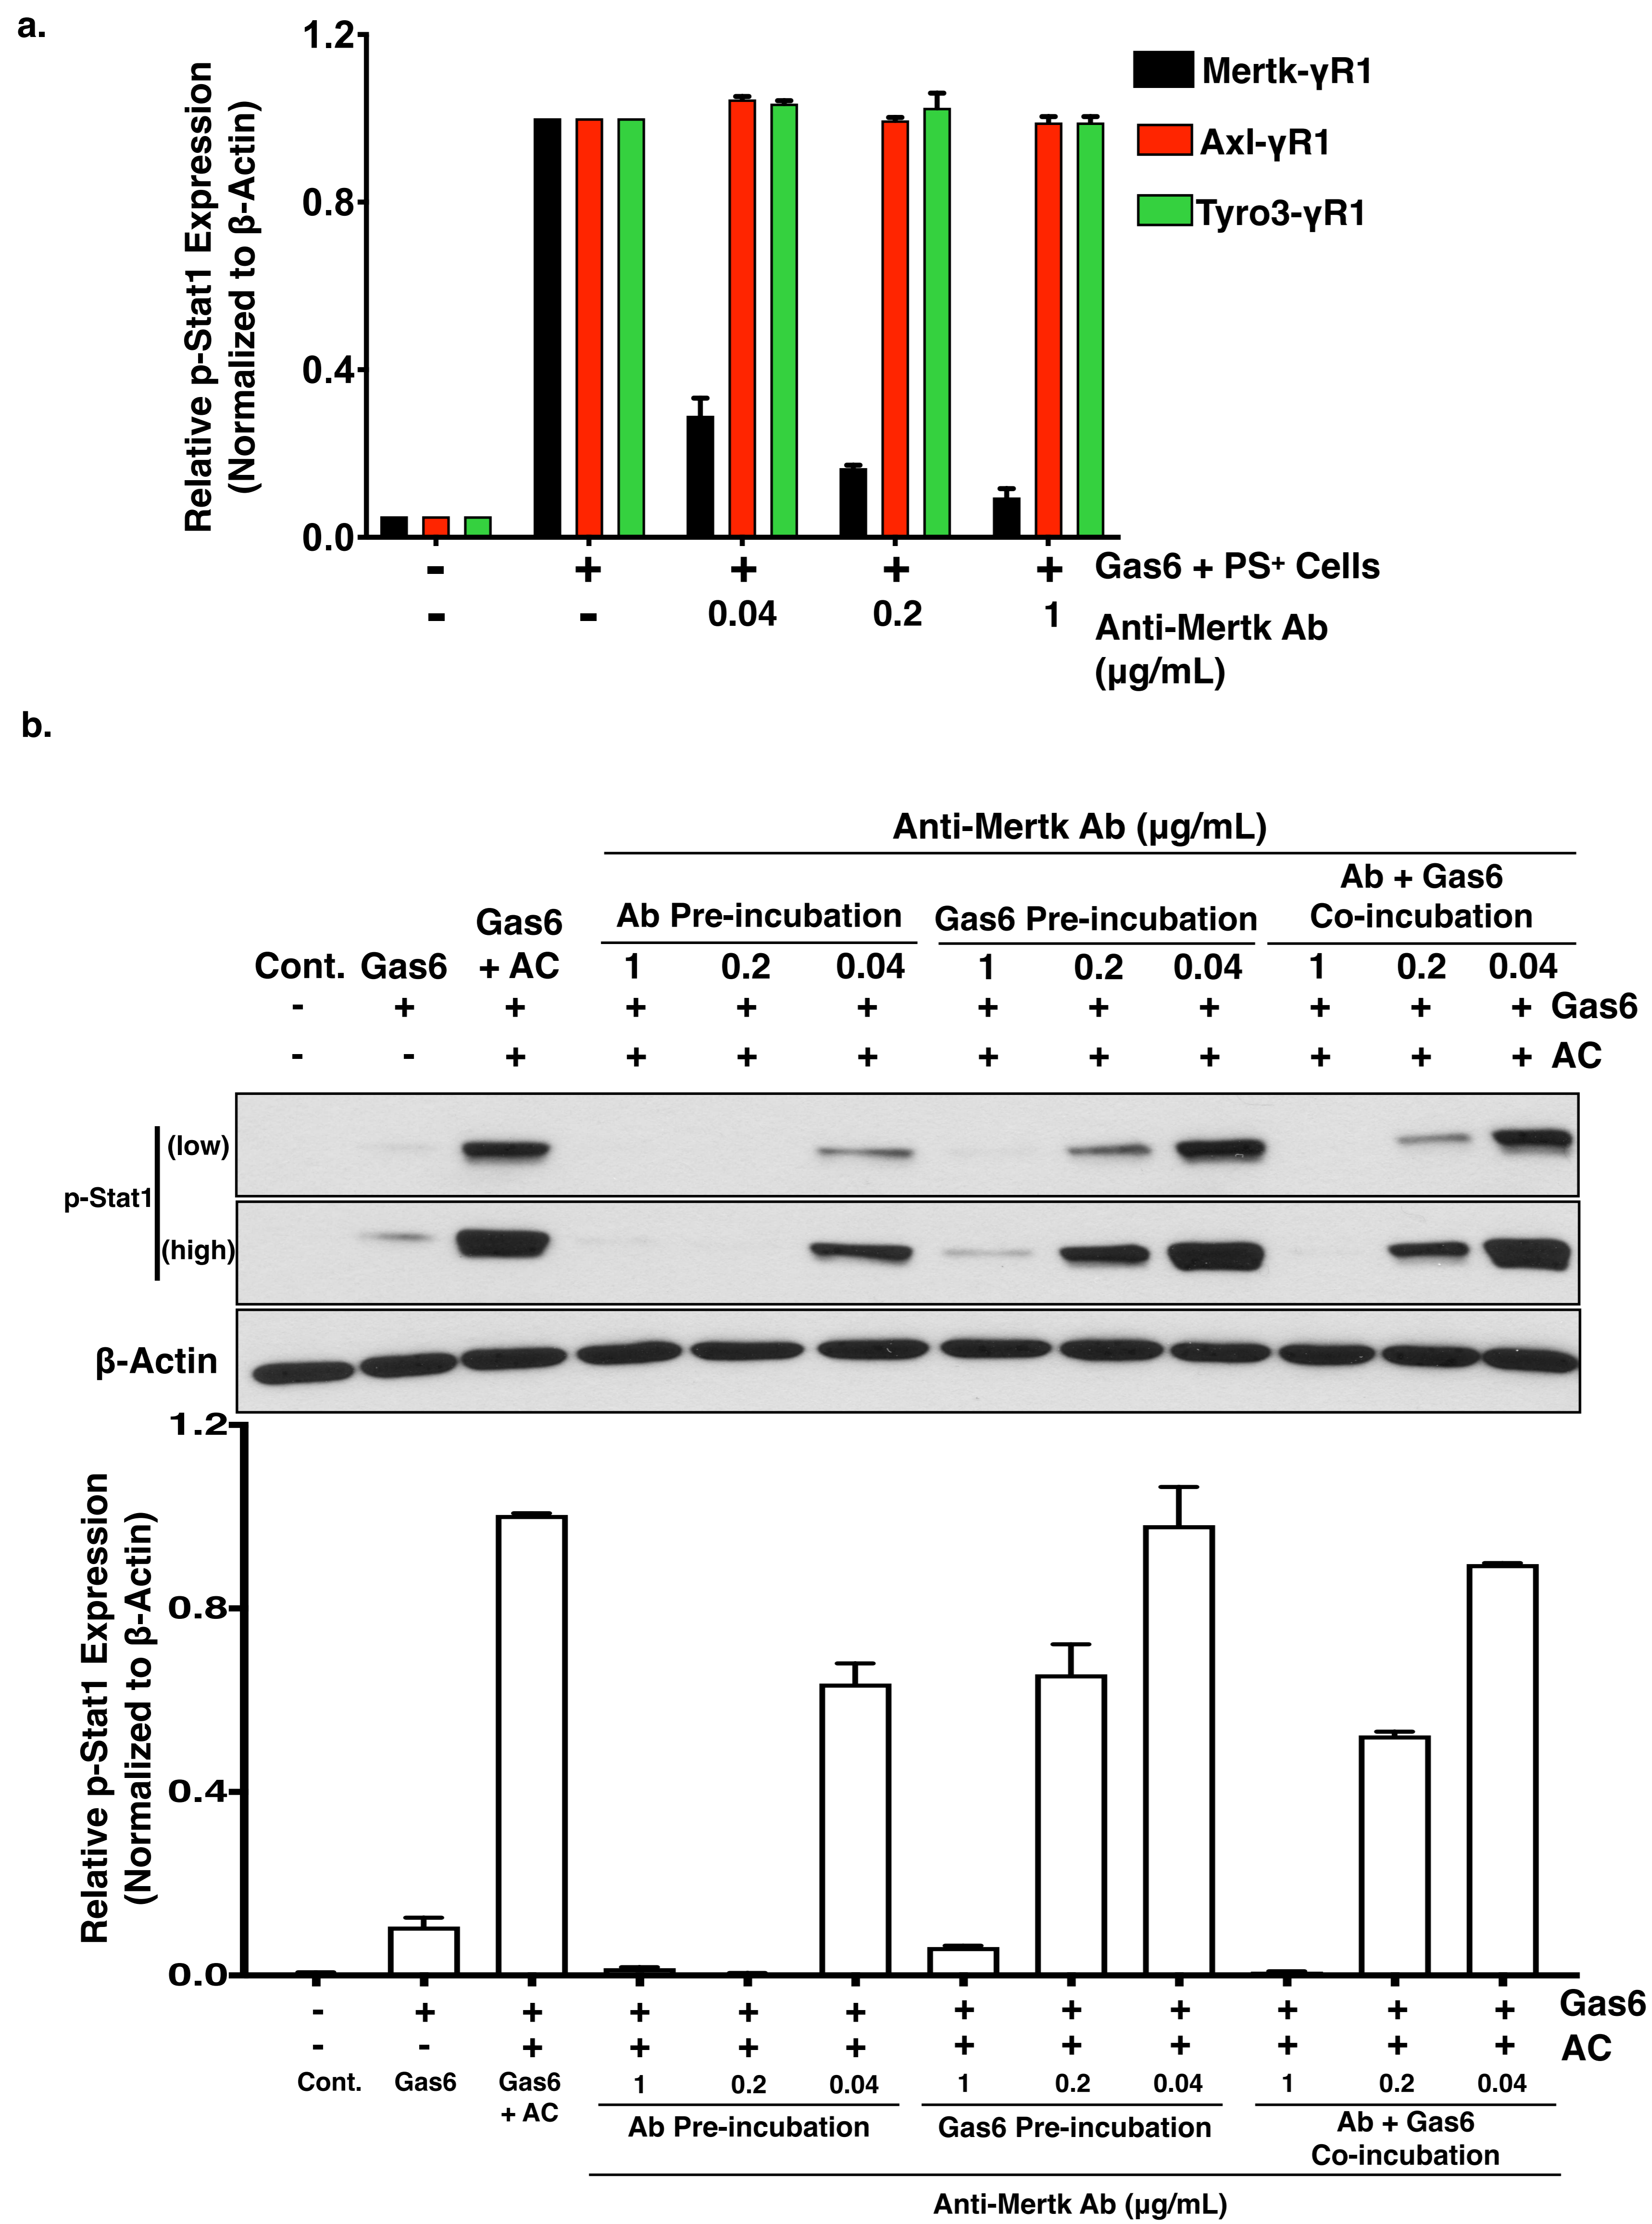

**Fig. S5. Effect of Anti-merck ab on the Mertk receptor inhibition.** **a.** Bargraph showing normalized expression of phospho Stat1 immunoblots from Mertk- $\gamma$ R1, Axl- $\gamma$ R1, Tyro3- $\gamma$ R1 cells pretreated with anti-Mertk antibody followed by Gas6 and apoptotic cells treatment for 30 mins **b.** Immunoblot analysis showing anti-Mertk antibody induced inhibition of Gas6 and apoptotic cells mediated activation of Mertk receptors in the CHO cells expressing chimeric murine Mer- $\gamma$ R1 receptors.



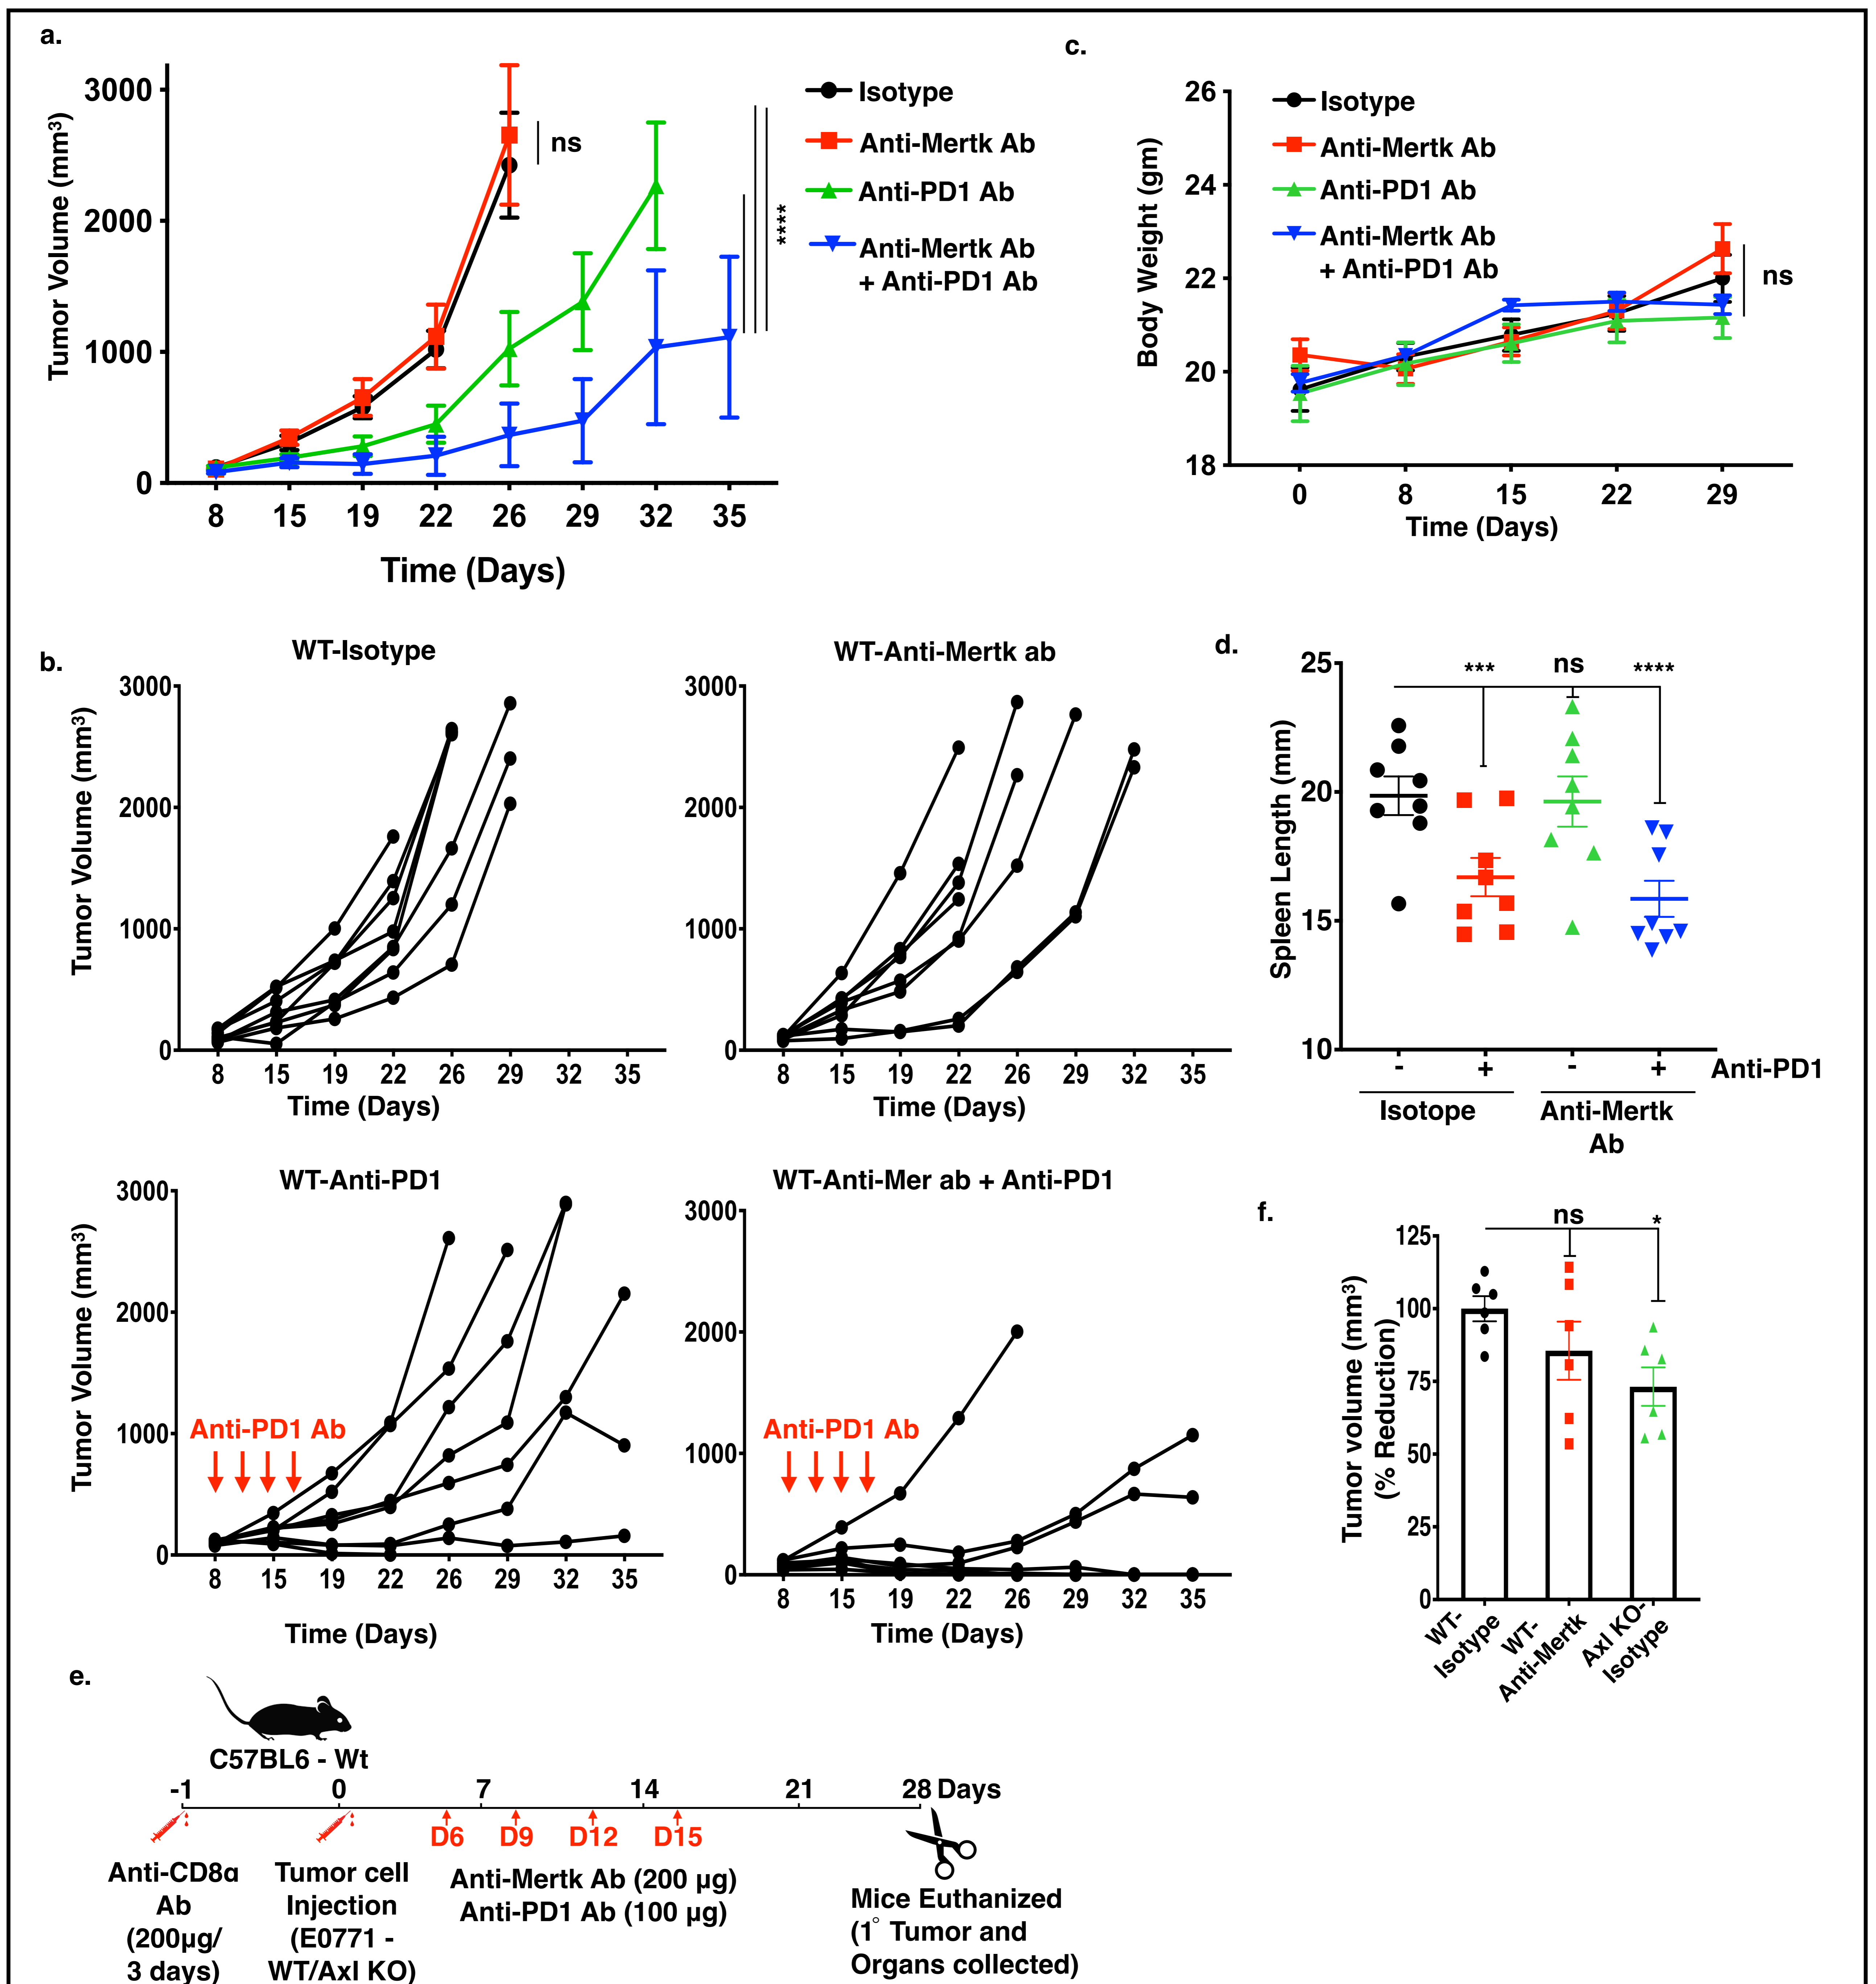

**Fig. S6. Effect of Anti-merck ab on the Merck receptor inhibition on tumor growth.** **a.** Anti-tumor effect of anti-Mertk mAb in combination with Anti-PD1 immunotherapy. E0771 tumor bearing females C57/B16 (n=8/per group) were treated with mIgG1 Isotype control, anti-Mertk aAb (10mg/kg), anti-PD1 ab (5mg/Kg) alone and anti-Mertk ab in combination with anti-PD1 ab on day 6, 9,12, and15 and tumor growth was studied twice a week over the period of 4 weeks. **b.** Spider curve showing tumor growth analysis in E0771 tumor bearing females C57/B16 (n=8/per group) treated with mIgG1 Isotype control, anti-Mertk aAb (10mg/kg), anti-PD1 ab (5mg/Kg) alone and anti-Mertk ab in combination with anti-PD1 ab. **c.** The whole-body weight of mice was measured once a week over the period of 4 weeks. **d.** Upon sacrifice, spleens were also collected, and splenomegaly was quantified by means of spleen Length. **e.** Experimental mouse model depicting Anti-CD8α ab treatment regimen in the mice injected with E0771 WT or Axl KO tumor cells or injected with E0771 WT cells and treated with anti-Mertk Ab alone or in combination with anti-PD1 immunotherapy. **f.** Bar graph representing tumor growth at d28 from the individual mice from each group from SCID mice.
